# Supplementary material
Source: PubMed Central journal article supplement (PMC6167203)
Supplement: NIHMS957300-supplement.pdf [file NIHMS957300-supplement.pdf]

# **Multivariate Relationships Between Cognition and Brain Anatomy Across the Psychosis Spectrum**

## ***Supplemental Information***

Supplementary Methods

Supplementary Results

Table S1. List of Cognitive Assessments, Domain of Cognition Assessed, and Group-Wise Comparison of Normed Means

Table S2. CCA Regions of Interest

Table S3. Schizo-Bipolar Scale Groups by DSM IV Diagnosis

Table S4. Symptom and Anti-psychotic Medication Effects on CCA Latent Variates

Figure S1. Jackknife Iteration Results

Figure S2. CCA Correlation

Figure S3. Spatial Pattern of Structural Loadings

Figure S4. Correlations between Structural Measures for each ROI

Table S5. Figure S3 Region Colors

Supplementary References

## Supplementary Methods

### Participants

Inclusion criteria for all participants were as follows: age between 18 and 60 years old, English proficiency, score of 70 or greater on the WRAT word reading test, no known history of head trauma or neurological disorders, and no substance abuse within the last month and/or substance dependence within the last 6 months as reported in the Structured Clinical Interview for DSM IV (1, 2). Participants were also required to pass a urine screening for illicit substances upon recruitment into the study. Healthy controls reported no personal or immediate family history of psychotic disorders and/or recurrent depression. Individuals with psychosis were stable and a majority were receiving consistent drug therapies from 4 weeks prior to study participation. There were 19 psychosis individuals who were unmedicated (i.e. reported no use of any psychotropic medications). Further details of recruitment procedures and clinical characterization of patient samples have been outlined elsewhere (3, 4). Thirty-three participants were missing gyrification measures, therefore gyrification analyses were based on 645 individuals rather than 678.

### MRI Scanning Protocols

All B-SNIP sites followed the Alzheimer's Disease Neuroimaging Initiative (ADNI1) protocol (see <http://adni.loni.usc.edu/methods/documents/mri-protocols/> for full list of parameters). The MPRAGE or IR-SPGR parameters (depending on the scanner type) were as follows:

*Site 1:* GE Signa (University of Chicago, Chicago IL): 3D acquisitions, sagittal slab, shot interval 2300ms, inversion time 700ms, TR 6.99ms, TE 2.85ms, flip angle 8°, FOV 260 (foot-to-head) x 260 (anterior-to-posterior) mm<sup>2</sup>, matrix 256x256, in-plane resolution 1x1 mm<sup>2</sup>, 166 slices, slice thickness 1.2 mm, voxel size 1x1x1.2 mm<sup>3</sup>, total scan duration 10min 28sec.

*Site 2:* Philips Achieva (UT Southwestern Medical Center, Dallas TX): 3D acquisitions, sagittal slab, shot interval 3000ms, inversion time 846ms, TR 6.8ms, TE 3.1ms, flip angle 8°, FOV 256 (foot-to-head) x 240 (anterior-to-posterior) mm<sup>2</sup>, matrix 256x240, in-plane resolution 1x1 mm<sup>2</sup>, 170 slices, slice thickness 1.2 mm, voxel size 1x1x1.2 mm<sup>3</sup>, total scan duration 9min 19sec.

*Site 3:* Siemens Allegra (Olin Institute of Living, Hartford Hospital, Hartford CT): 3D acquisitions, sagittal slab, shot interval 2300ms, inversion time 900ms, TR 7.2ms, TE 2.91ms, flip angle 9°, FOV 256 (foot-to-head) x 240 (anterior-to-posterior) mm<sup>2</sup>, matrix 256x240, in-plane resolution 1x1 mm<sup>2</sup>, 160 slices, slice thickness 1.2 mm, voxel size 1x1x1.2 mm<sup>3</sup>, total scan duration 9min 14sec.

*Site 4:* Siemens Trio (Maryland Psychiatric Research Center, University of Maryland, Baltimore MD): 3D acquisitions, sagittal slab, shot interval 2300ms, inversion time 900ms, TR 6.8ms, TE 2.91ms, flip angle 9°, FOV 256 (foot-to-head) x 240 (anterior-to-posterior) mm<sup>2</sup>, matrix 256x240, in-plane resolution 1x1 mm<sup>2</sup>, 160 slices, slice thickness 1.2 mm, voxel size 1x1x1.2 mm<sup>3</sup>, total scan duration 9min 14sec.

*Site 5a:* GE Signa HDxt (Harvard Medical School, Boston MA): 3D acquisitions, sagittal slab, inversion time 650ms, TR 7.0ms, TE 3.0ms, flip angle 8°, FOV 256 (foot-to-head) x 256 (anterior-to-posterior) mm<sup>2</sup>, matrix 256x256, in-plane resolution 1x1 mm<sup>2</sup>, 166 slices, slice thickness 1.2 mm, voxel size 1x1x1.2 mm<sup>3</sup>, total scan duration 9min 58sec.

*Site 5b:* Siemens Trio (Wayne State University, Detroit MI): 3D acquisitions, sagittal slab, shot interval 2300ms, inversion time 900ms, TR 6.8ms, TE 2.74ms, flip angle 8°, FOV 176 (foot-to-head) x 256 (anterior-to-posterior) mm<sup>2</sup>, matrix 176x256x176, in-plane resolution 1x1 mm<sup>2</sup>, slice thickness 1.2 mm, voxel size 1x1x1.2 mm<sup>3</sup>, total scan duration 10min 09sec.

## **MRI Pre-processing**

Structural measures were obtained using a standard pipeline in FreeSurfer v5.1 (5). After conversion of MRI data to NIfTI format, all images underwent rigorous data quality control as in Nanda *et al.* (6) and Padmanabhan *et al.* (7). Images were visually screened for scanner artifacts by trained raters. After this pre-check, they were run through a first-level auto-reconstruction (auto-recon1) in FreeSurfer. After auto-recon 1, brains were checked for remaining dura or sinus that could interfere with accurate segmentation. When non-brain tissue was found, images were edited manually by trained raters. All raters had inter-rater reliabilities (intra-class  $r$ ) above 95%. An independent rater then approved the images for further processing and were run through auto-recon 2 & 3. Gray matter volume (GMV), cortical thickness (CT), cortical surface area (CSA), and local gyrification index (LGI) measures were then extracted from 68 cortical regions using a standard cortical parcellation (Desikan-Killiany Atlas) available in FreeSurfer (8, 9) (see Table S2).

## **Schizo-Bipolar Scale**

Fifteen (5 from each diagnostic group) of the 438 individuals with psychosis included in the canonical correlation analysis had not been assigned Schizo-Bipolar Scale scores and were not included in further analyses. Assignment of SBS scores was performed by trained clinical raters across all B-SNIP sites. Intraclass Correlation Coefficients (ICCs) as well as other psychometric details of the SBS can be found in Keshavan *et al.* (10). Breakdown of SBS groups by DSM-IV diagnosis are in Table S3.

## Supplementary Results

### Symptom and Antipsychotic Medication Associations

Associations between latent variate scores, symptoms sub-scales, and anti-psychotic medication are listed in Table S4. There were a total of four significant associations after Bonferroni correction: the cognitive variate in the first pair of the CT (PANSSpos) and GMV (PANSSneg) analyses, the structural variate in the first pair of the CSA analysis (PANSSpos), and the structural variate in the second pair of the CT analysis (CPZ daily dose). All significant symptom associations were negative, with more severe symptomatology associated with lower scores on latent variates. Effect sizes for significant symptom associations, however, were small (ranging between  $\eta^2 = .02$  and  $\eta^2 = .03$ ). Larger daily CPZ doses were associated with higher latent scores on the CT structural variate (thinner cortex). The effect size, like those for symptoms, was small ( $\eta^2 = .02$ ).

**Table S1. List of Cognitive Assessments, Domain of Cognition Assessed, and Group-Wise Comparison of Normed Means**

| Assessment                                   | Cognitive Domain                | HC    |      | SBS 0-1 |      | SBS 2-4 |      | SBS 5-7 |      | SBS 8-9 |      | F<br>(3,659) | p      | ANOVA                                                     |
|----------------------------------------------|---------------------------------|-------|------|---------|------|---------|------|---------|------|---------|------|--------------|--------|-----------------------------------------------------------|
|                                              |                                 | Mean  | SD   | Mean    | SD   | Mean    | SD   | Mean    | SD   | Mean    | SD   |              |        | Post hoc <sup>c</sup>                                     |
| <b>WRAT Reading Subtest BACS<sup>a</sup></b> | Premorbid IQ                    | 104.5 | 13.7 | 104.5   | 13.8 | 100.1   | 14.1 | 98.8    | 16.3 | 95.9    | 16.1 | 11.8         | <.0001 | HC>SBS 5-7, SBS 8-9<br>SBS 0-1>SBS 8-9                    |
| TOL                                          | Executive Function              | 0.1   | 1.1  | -0.1    | 1.0  | -0.4    | 1.3  | -0.6    | 1.2  | -0.6    | 1.3  | 12.6         | <.0001 | HC>SBS 2-4, SBS 5-7, SBS 8-9<br>SBS 0-1>SBS 8-9           |
| Digit Sequencing                             | Working Memory                  | -0.05 | 1.1  | -0.5    | 1.2  | -0.5    | 1.1  | -0.9    | 1.1  | -1.2    | 1.2  | 31.4         | <.0001 | HC>all SBS<br>SBS 0-1, SBS 2-4>SBS 8-9                    |
| Symbol Coding                                | Attention/Processing Speed      | 0.1   | 1.0  | -0.9    | 1.0  | -1.0    | 1.0  | -1.1    | 1.2  | -1.4    | 1.2  | 74.9         | <.0001 | HC>all SBS<br>SBS 0-1, SBS 2-4>SBS 8-9                    |
| Verbal Memory                                | Verbal Memory                   | 0.02  | 1.0  | -0.5    | 1.3  | -0.6    | 1.2  | -1.0    | 1.3  | -1.1    | 1.5  | 25.6         | <.0001 | HC>all SBS<br>SBS 0-1>SBS 5-7, SBS 8-9<br>SBS 2-4>SBS 8-9 |
| Verbal Fluency                               | Processing Speed                | 0.2   | 1.0  | -0.1    | 1.2  | -0.1    | 1.3  | -0.4    | 1.1  | -0.7    | 1.1  | 22.8         | <.0001 | HC>SBS 2-4, SBS 5-7, SBS 8-9<br>SBS 0-1, SBS 2-4>SBS 8-9  |
| TMT                                          | Motor Speed                     | 0.04  | 1.0  | -0.8    | 1.2  | -1.1    | 1.2  | -1.2    | 1.2  | -1.4    | 1.2  | 62.0         | <.0001 | HC>all SBS<br>SBS 0-1>SBS 5-7, SBS 8-9                    |
| <b>WMS Spatial Span<sup>a</sup></b>          |                                 |       |      |         |      |         |      |         |      |         |      |              |        |                                                           |
| Forward Span                                 | Working Memory                  | 0.03  | 1.0  | -0.5    | 1.1  | -0.4    | 1.0  | -0.4    | 1.1  | -0.3    | 1.0  | 8.9          | <.0001 | HC>all SBS                                                |
| Backward Span                                | Working Memory                  | 0.1   | 0.9  | -0.6    | 1.0  | -0.5    | 1.1  | -0.6    | 0.9  | -0.6    | 1.1  | 24.9         | <.0001 | HC>all SBS                                                |
| <b>DPX<sup>b</sup></b>                       |                                 |       |      |         |      |         |      |         |      |         |      |              |        |                                                           |
| Correct RT                                   | Reaction Time                   | -0.1  | 1.0  | 0.5     | 1.0  | 0.2     | 1.1  | 0.5     | 1.2  | 0.7     | 1.4  | 18.6         | <.0001 | HC< SBS 0-1, SBS 5-7, SBS 8-9<br>SBS 2-4<SBS 8-9          |
| D-Prime                                      | Signal Detection                | 0.1   | 0.8  | -0.5    | 1.1  | -0.5    | 1.2  | -0.5    | 1.2  | -0.7    | 1.4  | 19.6         | <.0001 | HC>all SBS                                                |
| BX-AY                                        | Goal Maintenance/<br>Inhibition | -0.01 | 0.9  | 0.0     | 1.0  | 0.1     | 1.0  | -0.1    | 1.2  | 0.0     | 1.1  | .06          | .62    |                                                           |
| <b>Antisaccades<sup>b</sup></b>              |                                 |       |      |         |      |         |      |         |      |         |      |              |        |                                                           |
| Error Rate                                   | Inhibition/<br>Working Memory   | -0.1  | 1.0  | 0.7     | 1.5  | 0.8     | 1.7  | 1.1     | 1.6  | 1.7     | 1.8  | 44.6         | <.0001 | HC<all SBS<br>SBS 0-1, SBS 2-4, SBS 5-7 <<br>SBS 8-9      |

| Assessment | Cognitive Domain | HC    |     | SBS 0-1 |     | SBS 2-4 |     | SBS 5-7 |     | SBS 8-9 |     | F<br>(3,659) | p      | ANOVA                 |  |
|------------|------------------|-------|-----|---------|-----|---------|-----|---------|-----|---------|-----|--------------|--------|-----------------------|--|
|            |                  | Mean  | SD  | Mean    | SD  | Mean    | SD  | Mean    | SD  | Mean    | SD  |              |        | Post hoc <sup>c</sup> |  |
| Correct RT | Reaction Time    | -0.01 | 1.0 | 0.4     | 1.1 | 0.3     | 1.4 | 0.4     | 1.3 | 0.6     | 1.4 | 8.9          | <.0001 | HC<SBS 8-9            |  |

WRAT = Wide Range Achievement Test; BACS = Brief Assessment of Cognition in Schizophrenia; TOL = Tower of London; TMT = Token Motor Task; WMS= Wechsler Memory Scale; DPX = Dot Pattern Expectancy Task; RT = Reaction Time; HC= Healthy Control

<sup>a</sup>Means were calculated on z-scores and based on respective test norms.

<sup>b</sup>Means were calculated on z-scores and based on the study-wide healthy comparison sample without any elevated Cluster A traits.

<sup>c</sup>Post hoc tests were performed using Tukey's HSD. Comparisons listed were significant at  $p < .05$ .

**Table S2. CCA Regions of Interest**

| Lobe      | Component Sub-regions (Right and Left)                                                                                                                                                                               |
|-----------|----------------------------------------------------------------------------------------------------------------------------------------------------------------------------------------------------------------------|
| Frontal   | Caudal middle frontal, rostral middle frontal, medial orbitofrontal, lateral orbitofrontal, frontal pole, pars opercularis, pars orbitalis, pars triangularis, superior frontal, precentral, and paracentral regions |
| Parietal  | Inferior parietal, superior parietal, supramarginal, precuneus, and postcentral regions                                                                                                                              |
| Temporal  | Bank of superior temporal sulcus, inferior temporal, middle temporal, superior temporal, fusiform, entorhinal, parahippocampal, transverse temporal, temporal pole, and insula regions                               |
| Occipital | Cuneus, lingual, pericalcarine, and lateral occipital regions                                                                                                                                                        |
| Cingulate | Caudal anterior cingulate, isthmus cingulate, rostral anterior cingulate, and posterior cingulate regions                                                                                                            |

Regions of the Desikan-Killiany Atlas used for each CCA analysis.

**Table S3. Schizo-Bipolar Scale Groups by DSM IV Diagnosis**

|                                  |     | DSM Diagnosis |     |     |
|----------------------------------|-----|---------------|-----|-----|
|                                  |     | BP            | SAD | SZ  |
| Schizo-Bipolar Scale (SBS) Score | 0-1 | 92            | 0   | 0   |
|                                  | 2-4 | 56            | 41  | 2   |
|                                  | 5-7 | 0             | 60  | 38  |
|                                  | 8-9 | 0             | 10  | 124 |

Cells show number of DSM diagnoses in each of the groups determined by the SBS. DSM = Diagnostic and Statistical Manual; BP= Bipolar with psychosis; SAD= Schizoaffective; SZ= Schizophrenia



**Table S4. Symptom and Anti-psychotic Medication Effects on CCA Latent Variates**

| Cognitive Variates         | PANSS Total |      |          | PANSS pos |                   |          | PANSS neg |                    |          | YMRS    |      |          | MADRS   |     |          | CPZ     |                   |          |  |
|----------------------------|-------------|------|----------|-----------|-------------------|----------|-----------|--------------------|----------|---------|------|----------|---------|-----|----------|---------|-------------------|----------|--|
|                            | $\beta$     | p    | $\eta^2$ | $\beta$   | p                 | $\eta^2$ | $\beta$   | p                  | $\eta^2$ | $\beta$ | p    | $\eta^2$ | $\beta$ | p   | $\eta^2$ | $\beta$ | p                 | $\eta^2$ |  |
| Pair 1 GMV                 | -0.009      | .005 | 0.02     | -0.026    | .005              | 0.02     | -0.035    | <.001 <sup>a</sup> | 0.03     | <0.001  | .95  | <0.01    | 0.005   | .38 | <0.01    | <0.001  | .01               | 0.02     |  |
| Pair 1 CT                  | -0.007      | .02  | 0.01     | -0.031    | .001 <sup>a</sup> | 0.03     | -0.019    | .04                | 0.01     | -0.007  | .40  | <0.01    | 0.008   | .17 | <0.01    | <0.001  | .02               | 0.02     |  |
| Pair 1 CSA                 | -0.006      | .05  | 0.01     | -0.021    | .02               | 0.01     | -0.020    | .04                | 0.01     | <0.001  | .95  | <0.01    | 0.006   | .29 | <0.01    | <0.001  | .05               | 0.01     |  |
| Pair 1 LGI                 | -0.007      | .04  | 0.01     | -0.018    | .06               | 0.01     | -0.024    | .01                | 0.02     | <0.001  | 1.00 | <0.01    | 0.006   | .25 | <0.01    | <0.001  | .04               | 0.02     |  |
| Pair 2 GMV                 | 0.001       | .78  | <0.01    | 0.004     | .62               | <0.01    | -0.008    | .39                | <0.01    | 0.004   | .65  | <0.01    | 0.005   | .37 | <0.01    | <0.001  | .65               | <0.01    |  |
| Pair 2 CT                  | 0.004       | .27  | <0.01    | <0.001    | 1.00              | <0.01    | 0.025     | .01                | 0.02     | -0.020  | .02  | 0.01     | <0.001  | .93 | <0.01    | <0.001  | .03               | 0.02     |  |
| Pair 2 CSA                 | -0.003      | .35  | <0.01    | -0.009    | .30               | <0.01    | -0.012    | .17                | <0.01    | -0.008  | .29  | <0.01    | 0.003   | .50 | <0.01    | <0.001  | .87               | <0.01    |  |
| <b>Structural Variates</b> |             |      |          |           |                   |          |           |                    |          |         |      |          |         |     |          |         |                   |          |  |
| Pair 1 GMV                 | -0.007      | .02  | 0.01     | -0.030    | .00               | 0.02     | -0.026    | .01                | 0.02     | -0.002  | .78  | <0.01    | -0.002  | .68 | <0.01    | <0.001  | .17               | 0.01     |  |
| Pair 1 CT                  | -0.008      | .02  | 0.01     | -0.028    | .00               | 0.04     | -0.018    | .07                | <0.01    | 0.003   | .72  | <0.01    | -0.003  | .53 | <0.01    | <0.001  | .13               | <0.01    |  |
| Pair 1 CSA                 | -0.007      | .02  | 0.01     | -0.036    | <.001             | 0.02     | -0.009    | .35                | 0.01     | 0.006   | .49  | <0.01    | -0.001  | .87 | <0.01    | <0.001  | .94               | 0.01     |  |
| Pair 1 LGI                 | -0.008      | .01  | 0.02     | -0.022    | .014              | 0.02     | -0.018    | .05                | 0.01     | -0.006  | .44  | <0.01    | 0.001   | .90 | <0.01    | <0.001  | .83               | <0.01    |  |
| Pair 2 GMV                 | -0.003      | .28  | <0.01    | -0.009    | .32               | <0.01    | -0.020    | .02                | 0.01     | -0.002  | .84  | <0.01    | -0.002  | .68 | <0.01    | <0.001  | .18               | 0.01     |  |
| Pair 2 CT                  | -0.006      | .07  | 0.01     | -0.013    | .15               | 0.01     | -0.002    | .82                | <0.01    | -0.015  | .08  | 0.01     | -0.014  | .01 | 0.02     | 0.001   | .002 <sup>a</sup> | 0.03     |  |
| Pair 2 CSA                 | -0.004      | .16  | <0.01    | -0.017    | .06               | 0.01     | -0.012    | .17                | <0.01    | -0.007  | .35  | <0.01    | -0.010  | .06 | 0.01     | <0.001  | .16               | 0.01     |  |

Table shows parameter estimates, p-values, and eta<sup>2</sup> for the effects of symptoms and antipsychotic medication on CCA latent variates. GMV = Volume Analysis; CT= Cortical Thickness Analysis; CSA= Surface Area Analysis; LGI= Gyrfication Analysis; PANSS= Positive and Negative Syndrome Scale, YMRS=Young Mania Rating Scale, MADRS=Montgomery Asberg Depression Rating Scale; CPZ= Chlorpromazine Equivalent

<sup>a</sup>Significant at Bonferroni corrected p = .003.

# GMV- CCA Pair 1

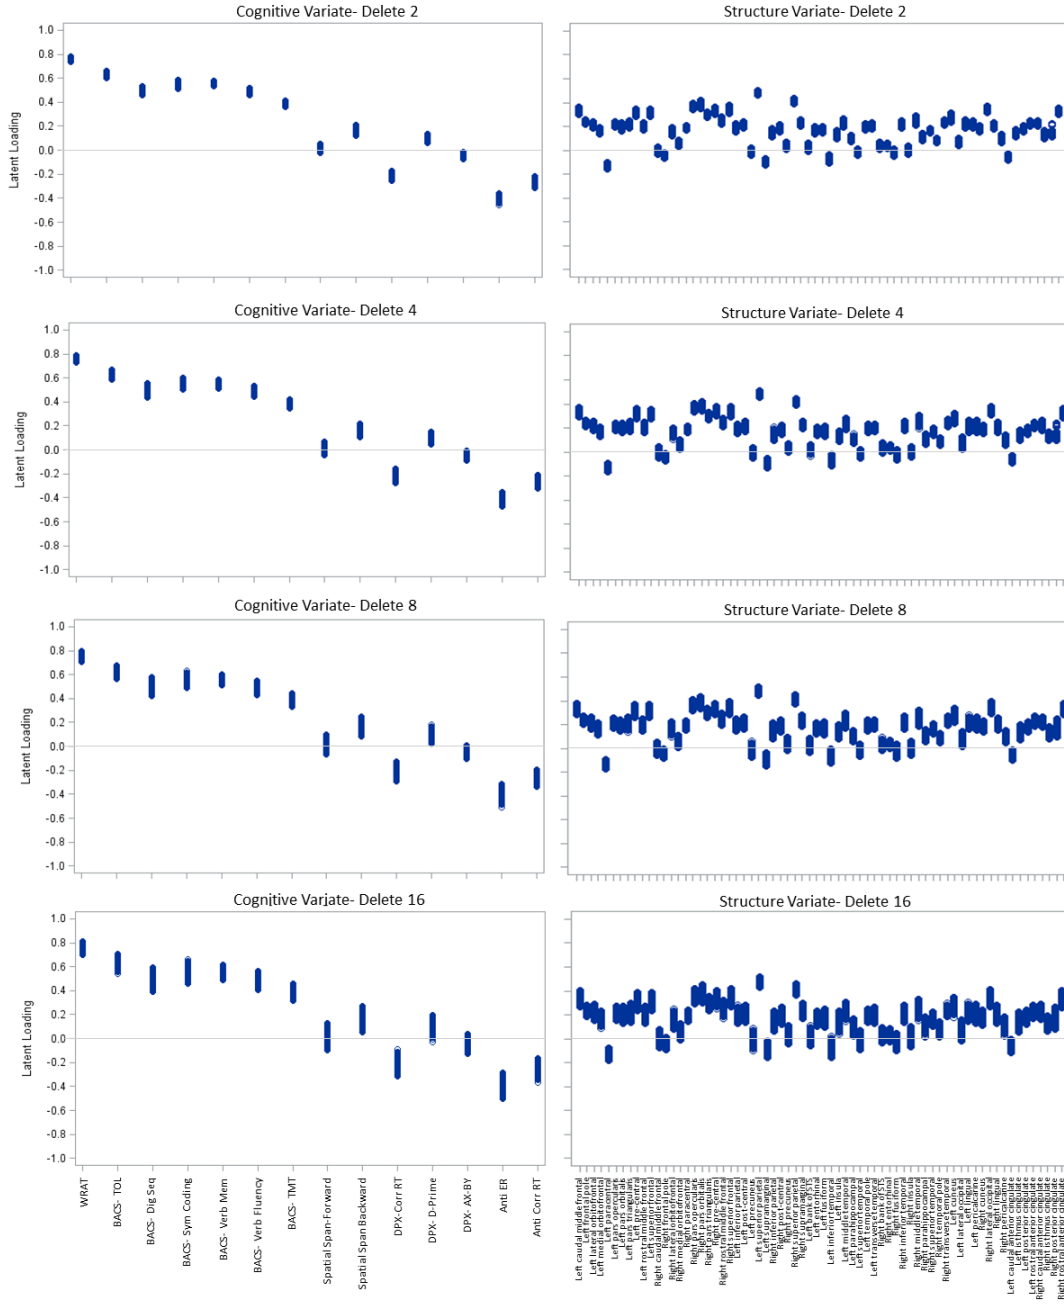

### GMV- CCA Pair 2

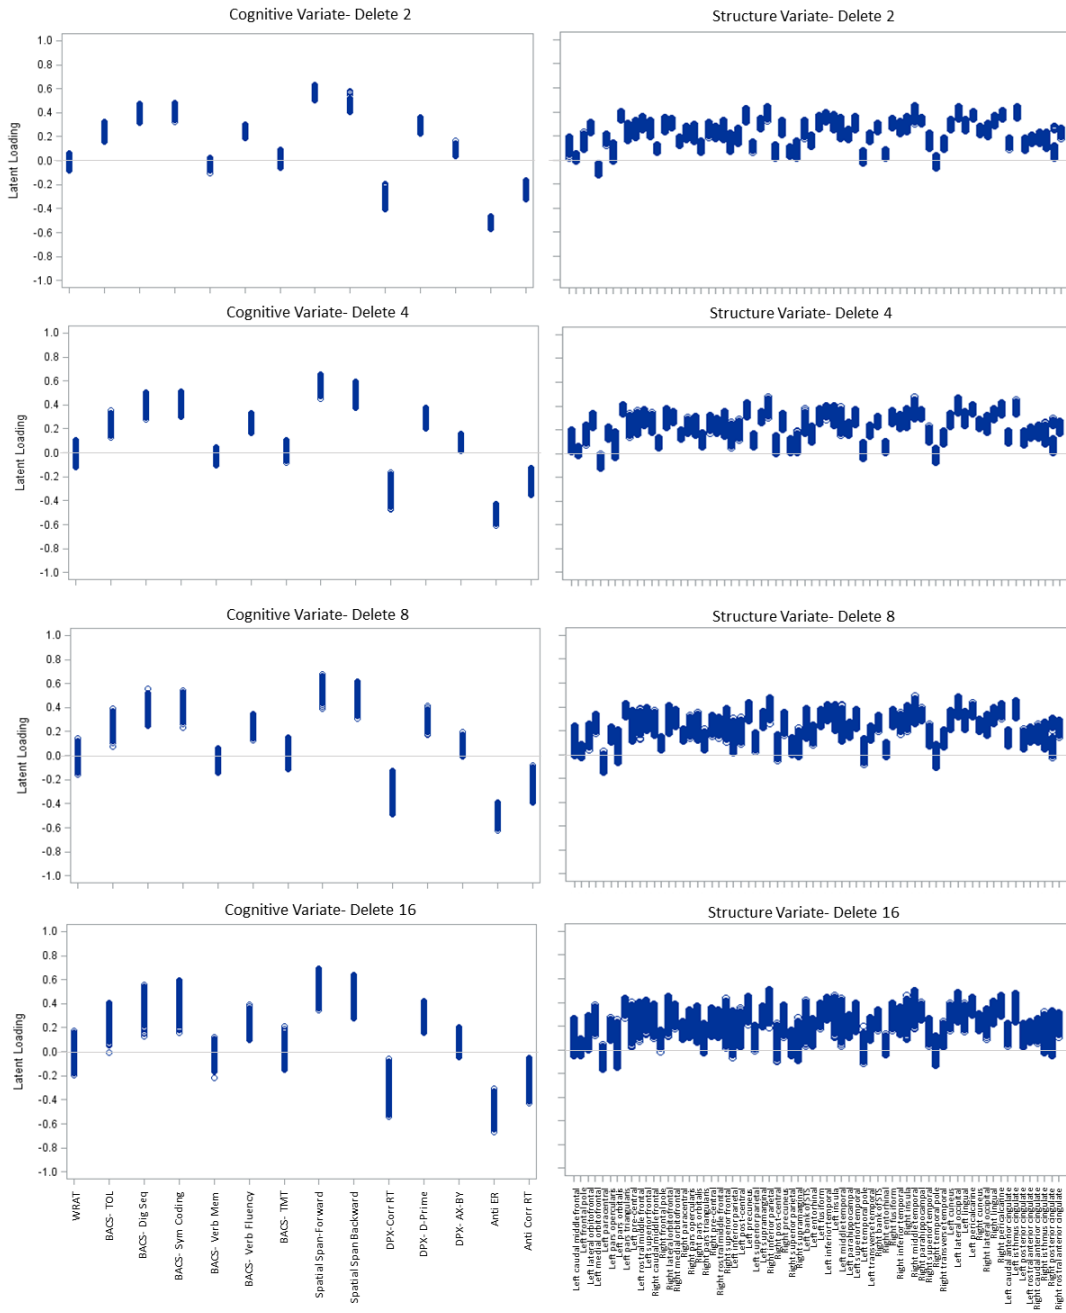

### CT- CCA Pair 1

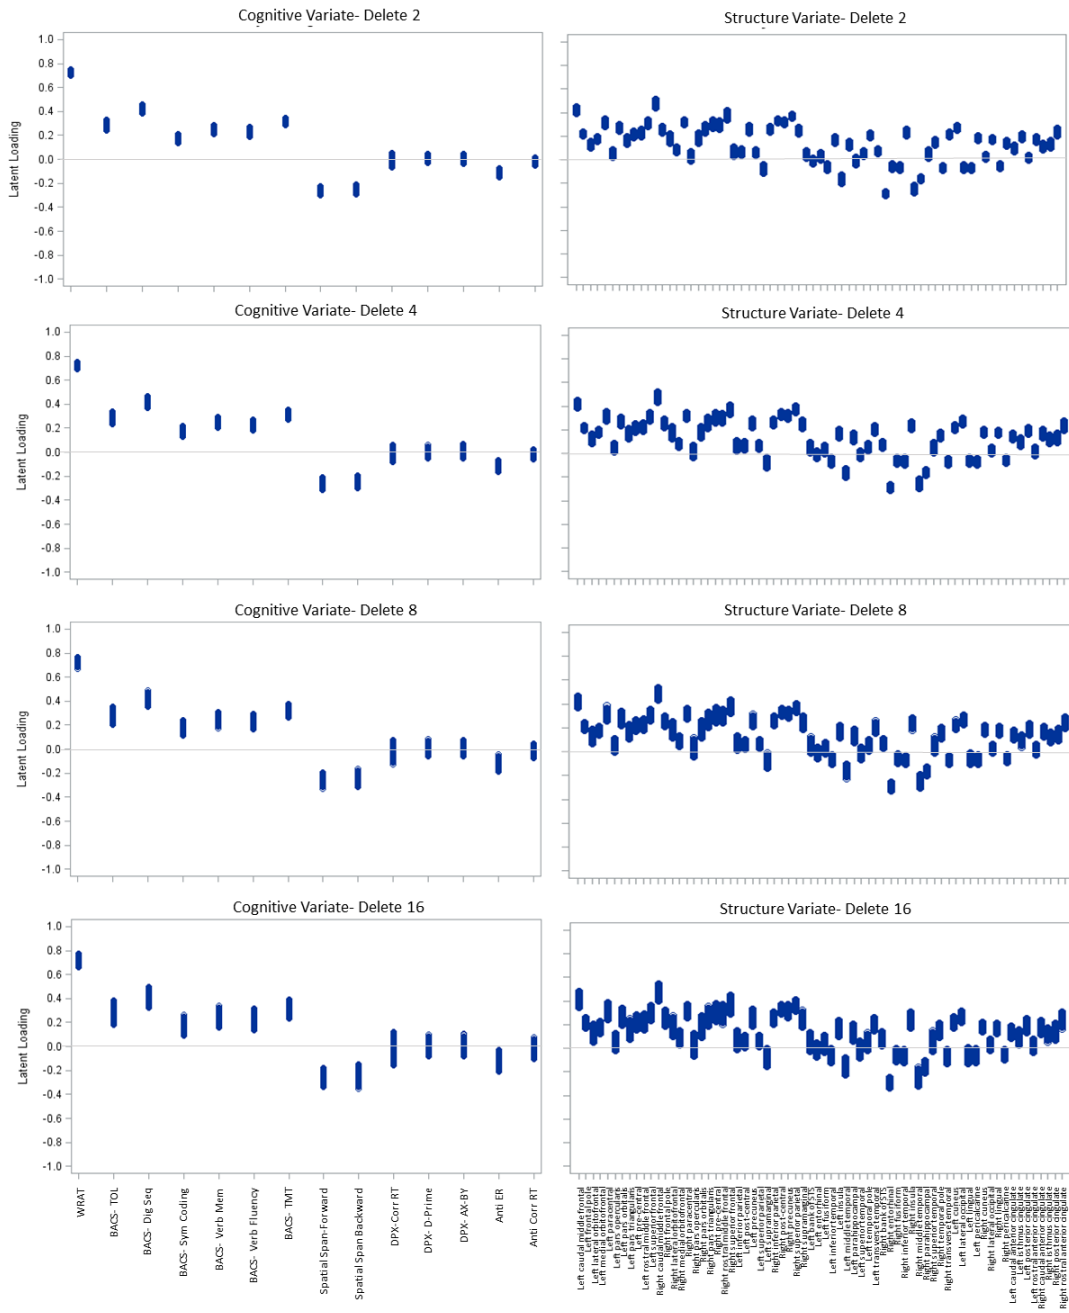

### CT- CCA Pair 2

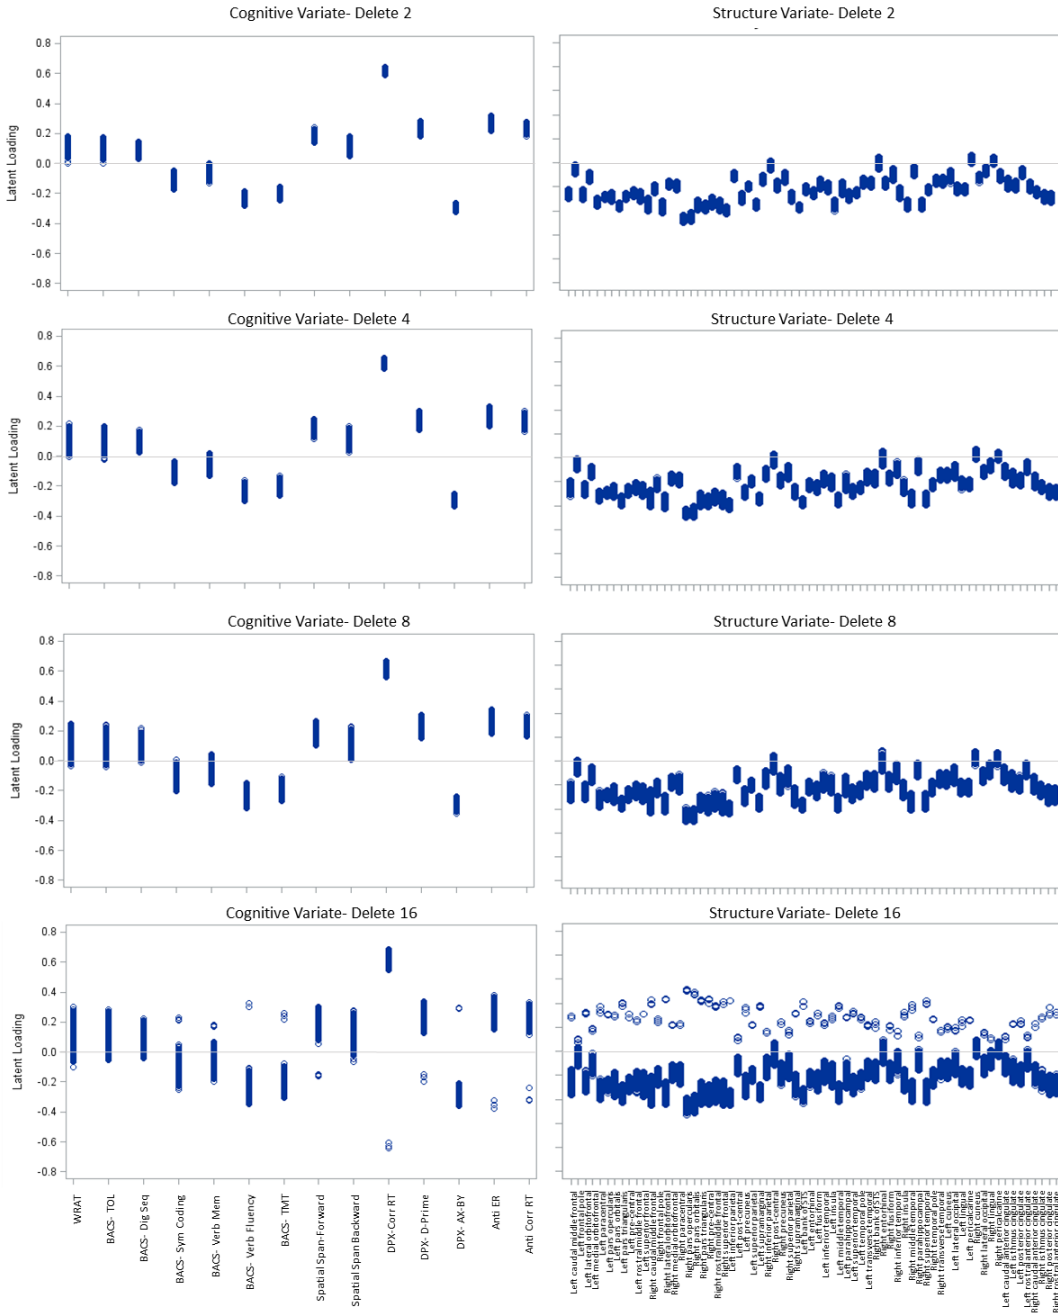

# CSA- CCA Pair 1

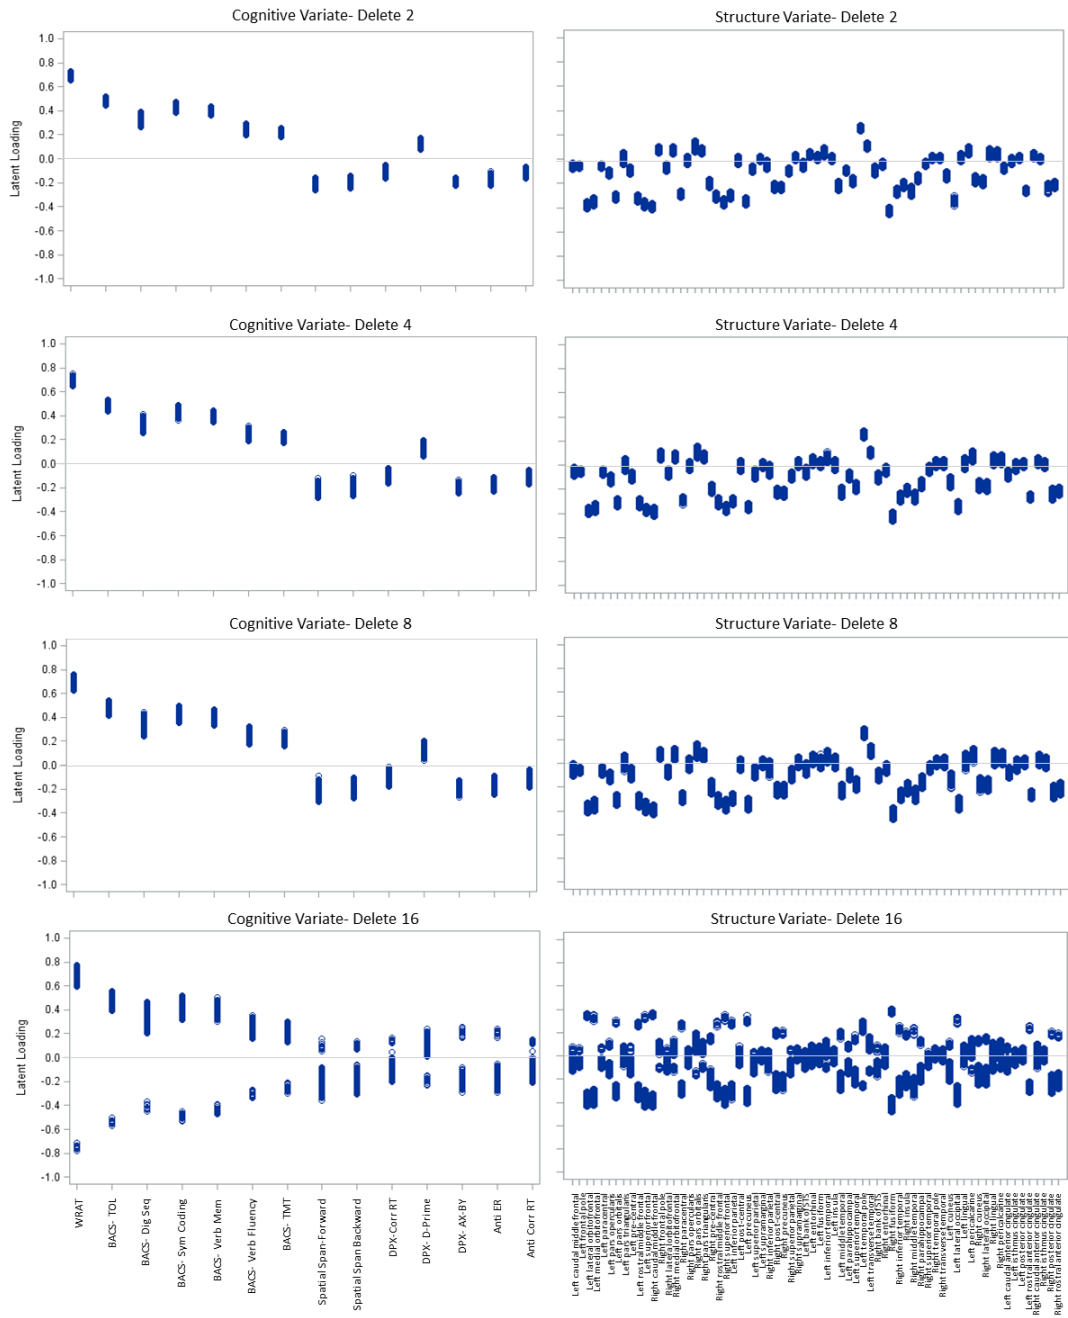

### CSA- CCA Pair 2

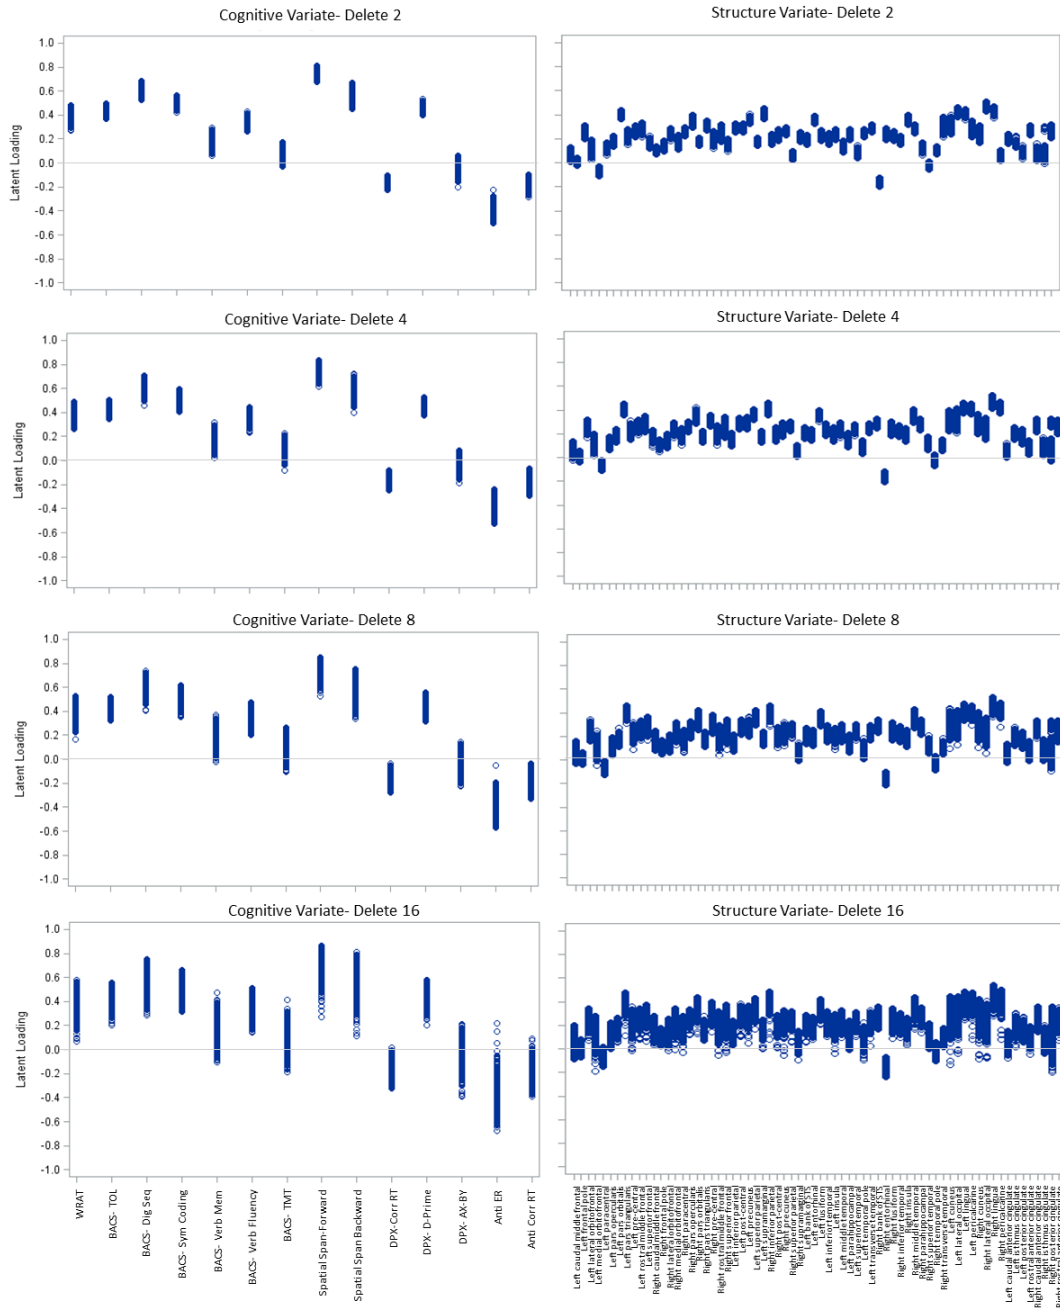

## LGI- CCA Pair 1

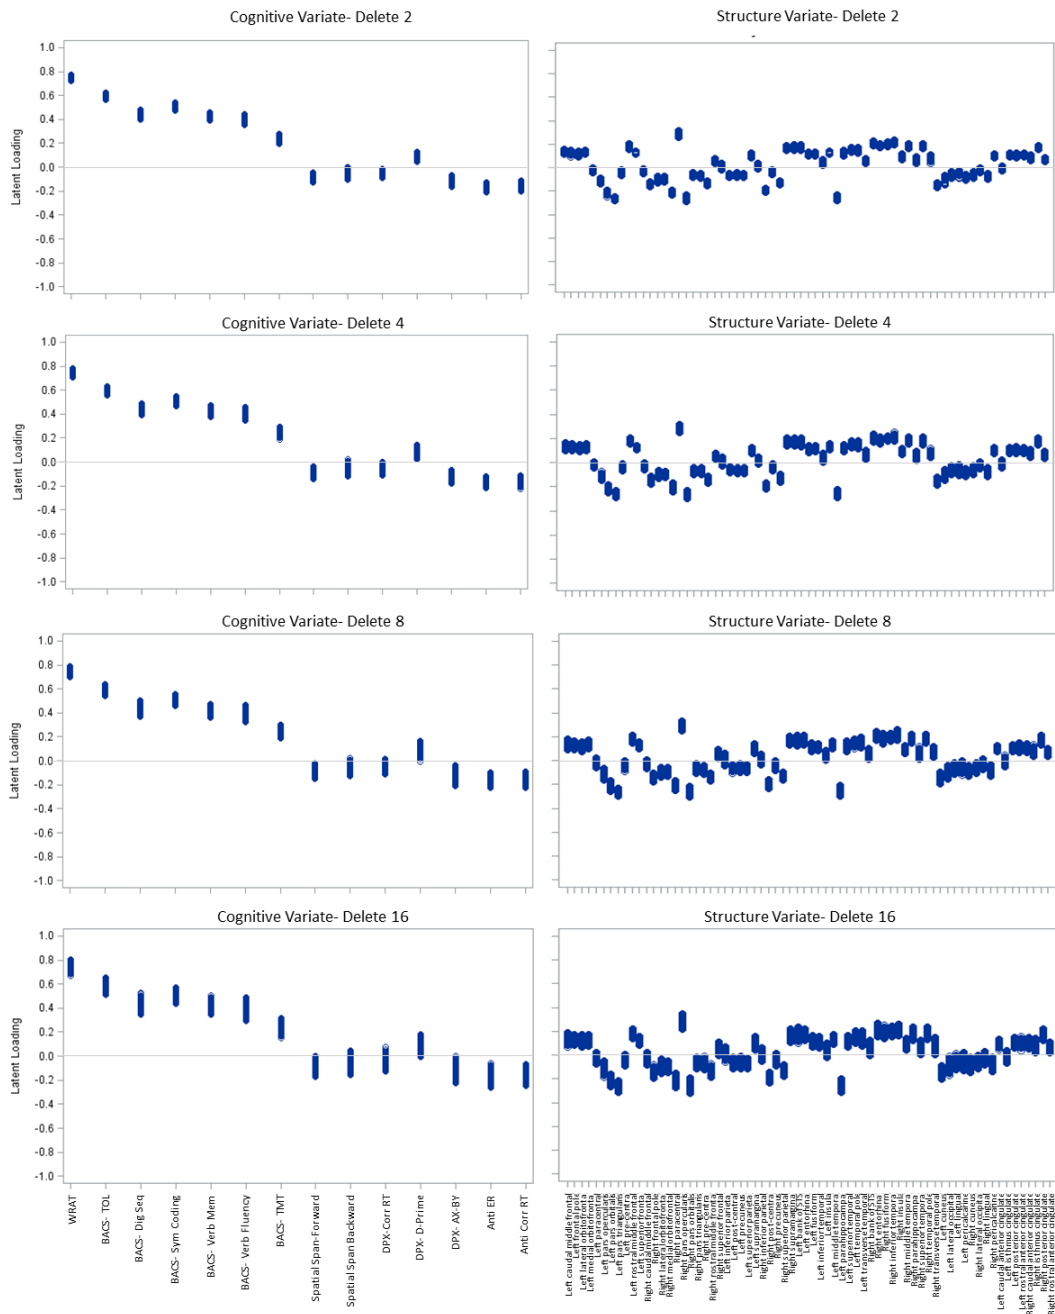

**Figure S1. Jackknife Iteration Results.** Plots show distribution of canonical loadings of individual measures across the 10,000 jackknife replicates for CCA pair 1 and 2 for the delete 4, 8, and 16 iterations. Reference lines are placed at zero to distinguish which individual measures included zero within the 99% confidence limits and those that did not. This aided in selection of CCA pairs for further interpretation and analysis. WRAT = Wide Range Achievement Test; BACS = Brief Assessment of Cognition in Schizophrenia; TOL = Tower of London; Dig Seq = Digit Sequencing; Sym Coding = Symbol Coding; Verb Mem = Verbal Memory; Verb Fluency = Verbal Fluency; TMT = Token Motor Task; DPX = Dot Pattern Expectancy Task; Anti = Antisaccade; ER = Error Rate; Corr RT = Correct Reaction Time



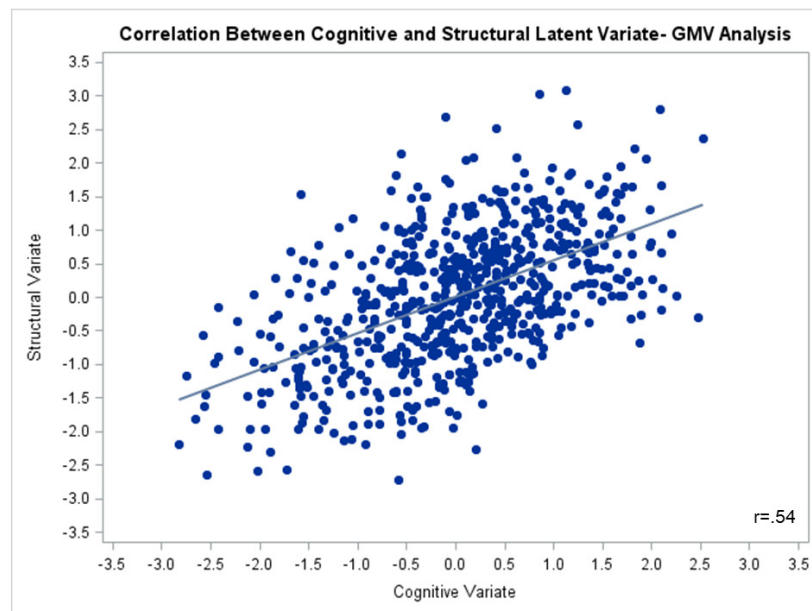

**Figure S2. CCA Correlation.** Plot shows the correlation between cognitive and structural latent variates from the first pair of the GMV CCA with regression line. Each dot is an individual. Given that all CCA pairs looked similar, we present only one pair here as a model.

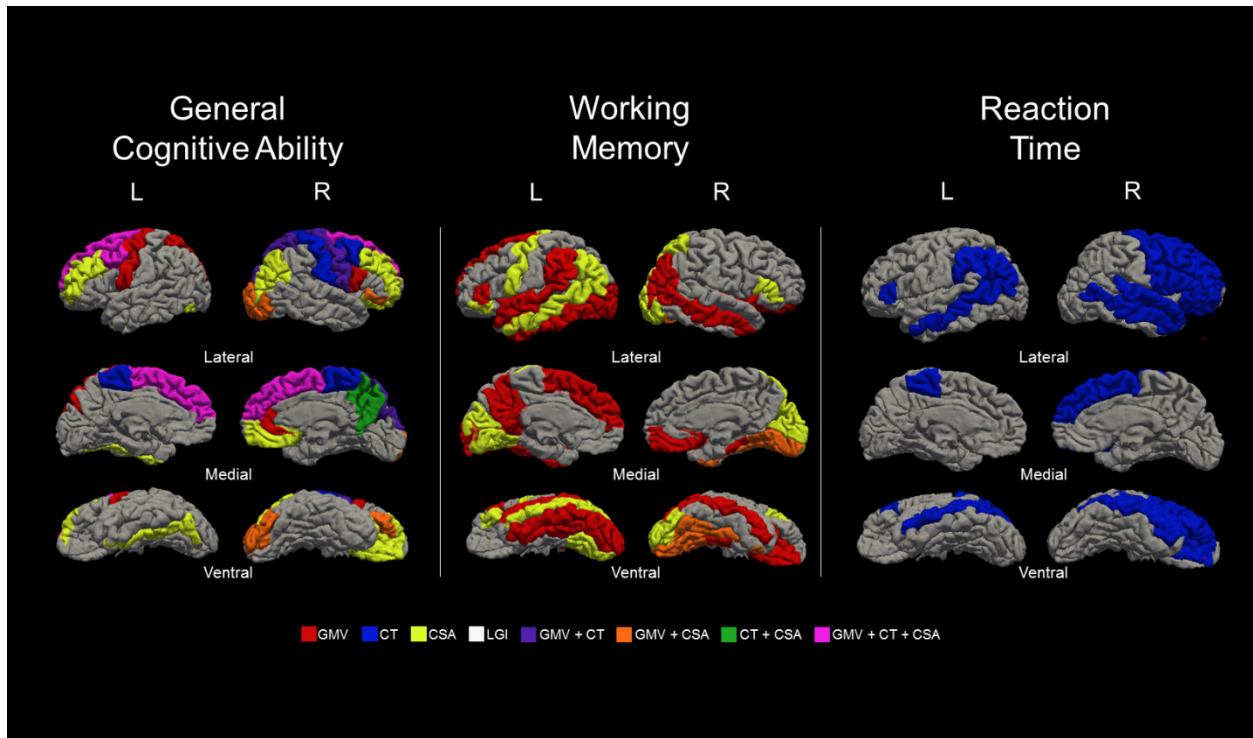

**Figure S3. Spatial Pattern of Structural Loadings.** Images show brain regions associated with particular cognitive abilities based on loadings obtained from the CCAs. Colors show regions with a loading beyond .3 and -.3 (moderate effect) in one or more of the CCA pairs. Regions with loadings beyond .3 in singular CCAs are in primary colors (red, blue, yellow); regions with loadings beyond .3 in multiple CCAs are a mixture of the primary colors used for the singular analyses (purple (red +blue), orange (red+yellow), green (blue+yellow)). Pink regions loaded highest in GMV, CT, and CSA analyses. General cognitive ability was associated with frontal and parietal regions. Working memory was associated with frontal-temporal regions. Reaction time was associated with regions in frontal/temporal cortex particularly in the right hemisphere and select parietal regions in the left hemisphere.

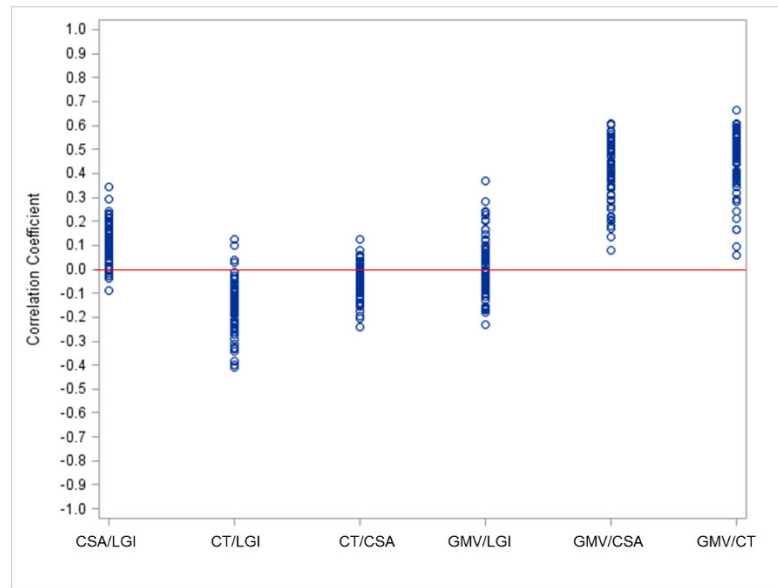

**Figure S4. Correlations between Structural Measures for each ROI.** Plot shows the correlations between each pair of structural measures for each ROI (blue dots). A red reference line marks a correlation coefficient of 0 (no relationship). The strongest and most consistent correlations are for those between GMV and CSA and GMV and CT, both positive. This is expected given that larger volumes can result from thicker cortices, larger surface area or both.

**Table S5. Figure S3 Region Colors**

| ROI                          | General Cognitive Ability | Working Memory | Reaction Time |
|------------------------------|---------------------------|----------------|---------------|
| Left caudal middle frontal   | pink                      |                |               |
| Left lateral orbitofrontal   |                           |                |               |
| Left medial orbitofrontal    |                           |                |               |
| Left paracentral             | blue                      |                | blue          |
| Left pars opercularis        |                           |                |               |
| Left pars orbitalis          |                           | yellow         |               |
| Left pars triangularis       |                           | red            | blue          |
| Left precentral              | red                       | yellow         |               |
| Left rostral middle frontal  | yellow                    |                |               |
| Left superior frontal        | pink                      | red            |               |
| Left frontal pole            |                           |                |               |
| Right caudal middle frontal  | blue                      |                | blue          |
| Right lateral orbitofrontal  | yellow                    | red            | blue          |
| Right medial orbitofrontal   | yellow                    | red            |               |
| Right paracentral            | blue                      |                |               |
| Right pars opercularis       | red                       |                | blue          |
| Right pars orbitalis         | orange                    |                | blue          |
| Right pars triangularis      |                           | yellow         | blue          |
| Right precentral             | purple                    |                | blue          |
| Right rostral middle frontal | yellow                    |                | blue          |
| Right superior frontal       | pink                      |                | blue          |
| Right frontal pole           |                           |                |               |
| Left inferior parietal       |                           | yellow         | blue          |
| Left postcentral             |                           |                |               |
| Left precuneus               |                           | red            |               |
| Left superior parietal       | red                       |                |               |
| Left supramarginal           |                           | red            | blue          |
| Right inferior parietal      | yellow                    | red            |               |
| Right postcentral            | blue                      |                |               |

| ROI                       | General Cognitive Ability | Working Memory | Reaction Time |
|---------------------------|---------------------------|----------------|---------------|
| Right precuneus           | green                     |                |               |
| Right superior parietal   | purple                    | yellow         |               |
| Right supramarginal       |                           |                |               |
| Left bank of the STS      |                           |                | blue          |
| Left entorhinal           |                           |                |               |
| Left fusiform             | yellow                    | red            |               |
| Left inferior temporal    |                           | red            |               |
| Left middle temporal      |                           | yellow         | blue          |
| Left parahippocampal      |                           |                |               |
| Left superior temporal    |                           | red            |               |
| Left temporal pole        |                           |                |               |
| Left transverse temporal  |                           |                |               |
| Left insula               |                           | red            |               |
| Right bank of the STS     |                           |                |               |
| Right entorhinal          |                           |                |               |
| Right fusiform            |                           | orange         |               |
| Right inferior temporal   |                           |                |               |
| Right middle temporal     |                           | red            | blue          |
| Right parahippocampal     |                           | red            |               |
| Right superior temporal   |                           |                | blue          |
| Right temporal pole       |                           |                |               |
| Right transverse temporal |                           |                |               |
| Right insula              |                           | red            |               |
| Left cuneus               |                           | yellow         |               |
| Left lateral occipital    |                           | red            |               |
| Left lingual              |                           | yellow         |               |
| Left pericalcarine        |                           | orange         |               |
| Right cuneus              |                           | yellow         |               |
| Right lateral occipital   | orange                    | yellow         |               |
| Right lingual             |                           | orange         |               |

| ROI                              | General Cognitive Ability | Working Memory | Reaction Time |
|----------------------------------|---------------------------|----------------|---------------|
| Right pericalcarine              |                           | orange         |               |
| Left caudal anterior cingulate   |                           |                |               |
| Left isthmus cingulate           |                           | red            |               |
| Left posterior cingulate         |                           |                |               |
| Left rostral anterior cingulate  |                           |                |               |
| Right caudal anterior cingulate  |                           |                |               |
| Right isthmus cingulate          |                           |                |               |
| Right posterior cingulate        |                           |                |               |
| Right rostral anterior cingulate | red                       |                |               |

Color key for Figure S3 for each cognitive domain represented by the CCAs. Regions with any color had moderate loadings (>.3 and > -.3) on one or more of the CCA structural variates. Regions in gray in Figure S2 are blank in the above table. Individual color values indicate in which CCA the ROI had moderate loadings. red= GMV analysis only, blue= CT analysis only, yellow=CSA analysis only, purple= GMV and CT analyses, orange=GMV and CSA analyses, green= CT and CSA analyses, pink=GMV, CT, and CSA analyses.

**Supplementary References**

1. First MD SR, Gibbon M, Williams JBW (1995): Structured Clinical Interview for DSM-IV Axis I Disorders, Non-Patient Edition. New York State Psychiatric Institute, Biometrics Research, New York,.
2. First MD SR, Gibbon M, Williams JBW (1995): Structured Clinical Interview for DSM-IV Axis I Disorders, Patient Edition. New York State Psychiatric Institute, Biometrics Research, New York,.
3. Ivleva EI, Bidesi AS, Keshavan MS, Pearlson GD, Meda SA, Dodig D, *et al.* (2013): Gray matter volume as an intermediate phenotype for psychosis: Bipolar-Schizophrenia Network on Intermediate Phenotypes (B-SNIP). *Am J Psychiatry* 170(11): 1285-1296.
4. Tamminga CA, Ivleva EI, Keshavan MS, Pearlson GD, Clementz BA, Witte B, *et al.* (2013): Clinical phenotypes of psychosis in the Bipolar-Schizophrenia Network on Intermediate Phenotypes (B-SNIP). *Am J Psychiatry*.
5. Fischl B (2012): FreeSurfer. *Neuroimage* 62(2): 774-781.
6. Nanda P, Tandon N, Mathew IT, Giakoumatos CI, Abhishekh HA, Clementz BA, *et al.* (2014): Local Gyrfication Index in Probands with Psychotic Disorders and Their First-Degree Relatives. *Biol Psychiatry* 76(6): 447-455.
7. Padmanabhan JL, Tandon N, Haller CS, Mathew IT, Eack SM, Clementz BA, *et al.* (2015): Correlations between brain structure and symptom dimensions of psychosis in schizophrenia, schizoaffective, and psychotic bipolar I disorders. *Schizophr Bull* 41(1): 154-162.
8. Desikan RS, Ségonne F, Fischl B, Quinn BT, Dickerson BC, Blacker D, *et al.* (2006): An automated labeling system for subdividing the human cerebral cortex on MRI scans into gyral based regions of interest. *Neuroimage* 31(3): 968-980.
9. Fischl B, van der Kouwe A, Destrieux C, Halgren E, Ségonne F, Salat DH, *et al.* (2004): Automatically parcellating the human cerebral cortex. *Cereb Cortex* 14(1): 11-22.
10. Keshavan MS, Morris DW, Sweeney JA, Pearlson G, Thaker G, Seidman LJ, *et al.* (2011): A dimensional approach to the psychosis spectrum between bipolar disorder and schizophrenia: The Schizo-Bipolar Scale. *Schizophr Res* 133(1-3): 250-254.
11. Hochberg Y (1988): A sharper Bonferroni procedure for multiple tests of significance. *Biometrika* 75(4): 800-802.
